# Supplementary material for: Characterization of the Abracl-Expressing Cell Populations in the Embryonic Mammalian Telencephalon
Source: MDPI journal article supplement (doi:10.3390/biom13091337), 2023-08-31
Supplement: s1 [file s1]

## Supplementary Figure Legends

**Figure S1.** *Abrac1* is expressed in the subpallial SVZ and M. Double immunofluorescence on coronal sections of E12.5 (**A-C**) and E13.5 (**D-F**), E15.5 (**G-I**) and E18.5 (**J-L**) embryos for *Abrac1* (**A, D, G, J**) and Ki67 (**B, E, H, K**). (**C, F, I** and **L**) are merged images. LGE, lateral ganglionic eminence, MGE, medial ganglionic eminence, VZ, ventricular zone, SVZ, subventricular zone, M, mantle, V-SVZ, ventricular-subventricular zone, STR, striatum. Scale bars: 200µm.

**Figure S2.** *Abrac1* is coexpressed with the neurogenic factor *Ascl1* in the subpallial SVZ. Double immunofluorescence on coronal sections of E12.5 (**A-C**) and E13.5 (**D-F**), E15.5 (**G-I**) and E18.5 (**J-L**) embryos for *Abrac1* (**A, D, G, J**) and *Ascl1* (**B, E, H, K**). (**C, F, I** and **L**) are merged images. LGE, lateral ganglionic eminence, MGE, medial ganglionic eminence, VZ, ventricular zone, SVZ, subventricular zone, M, mantle, V-SVZ, ventricular-subventricular zone, STR, striatum. Scale bars: 200µm.

**Figure S3.** *Abrac1* is coexpressed with *Dlx2* in the subpallial SVZ. Double immunofluorescence on coronal sections of E12.5 (**A-C**) and E13.5 (**D-F**), E15.5 (**G-I**) and E18.5 (**J-L**) embryos for *Abrac1* (**A, D, G, J**) and *Dlx2* (**B, E, H, K**). (**C, F, I** and **L**) are merged images. LGE, lateral ganglionic eminence, MGE, medial ganglionic eminence, VZ, ventricular zone, SVZ, subventricular zone, M, mantle, V-SVZ, ventricular-subventricular zone, STR, striatum. Scale bars: 200µm.

**Figure S4.** *Abrac1* is not expressed in the proliferative zones of the pallium. Double immunofluorescence on coronal sections of E12.5 (**A-C**) and E13.5 (**D-F**), E15.5 (**G-I**) and E18.5 (**J-L**) embryos for *Abrac1* (**A, D, G, J**) and Ki67 (**B, E, H, K**). (**C, F, I** and **L**) are merged images. LV, lateral ventricle, CP, cortical plate, Hip, hippocampus. Scale bars: 200µm.

**Figure S5.** *Abrac1* expression in internal capsule at E15.5 and E18.5. Double immunofluorescence on coronal sections of E15.5 (**A-D**) and E18.5 (**E-H**) embryos for *Abrac1* (**A,E**) and *Tubb3* (**B,F**). (**C,G**) DAPI staining of nuclei; tracts are not stained as they lack nuclei, and therefore appear black. (**D**) and (**H**) are merged images. ic, internal capsule. Scale bars: 200µm.

**Figure S6.** *Abrac1* expression in lateral olfactory tract and anterior commissure. Double immunofluorescence on coronal sections of E15.5 (**A-D**) and E18.5 (**E-H**) embryos for *Abrac1* (**A,E**) and *Tubb3* (**B,F**). (**C,G**) DAPI staining of nuclei; tracts are not stained as they lack nuclei, and therefore appear black. (**D**) and (**H**) are merged images. ac, anterior commissure, lot, lateral olfactory tract. Scale bars: 200µm.
